1 **Synaptic Plasticity in the Agranular Insular Cortex Predicts Escalated**  
2 **Ethanol Consumption**

3 **Joel E. Shillinglaw, Heather C. Aziz, Daniela G. Carrizales, Richard A. Morrisett<sup>§</sup>, Regina A.**  
4 **Mangieri<sup>§\*</sup>**

5 Division of Pharmacology and Toxicology, College of Pharmacy, The University of Texas at Austin,  
6 Austin, TX, United States

7 <sup>§</sup>Co-senior author

8 \*Correspondence:

9 Regina A. Mangieri

10 2409 University Ave. Stop A1915

11 Austin, TX 78712 USA

12 Telephone: 1-512-471-5199

13 Fax: 1-512-475-6088

14 Email: [reginamangieri@utexas.edu](mailto:reginamangieri@utexas.edu)

15 **Abstract**

16 The Agranular Insular Cortex (AIC) is implicated in alcohol use disorder and pharmacologically  
17 relevant concentrations of acute ethanol inhibit N-methyl-D-aspartate receptor (NMDAR)-mediated  
18 glutamatergic synaptic transmission and plasticity onto layer 2/3 AIC pyramidal neurons. However,  
19 it is not known whether the actions of ethanol on glutamatergic synapses are means by which chronic  
20 ethanol alters mechanisms of learning and memory in AIC as alcohol drinking transitions from  
21 controlled to problematic. We utilized the chronic intermittent ethanol (CIE) vapor model of ethanol  
22 exposure in adult male mice, alone or in combination with voluntary ethanol consumption, to  
23 determine whether glutamatergic synapses on layer 2/3 AIC pyramidal neurons are differentially  
24 regulated by different durations and intensities of chronic ethanol exposure. We observed evidence  
25 of both ethanol- and age-related metaplasticity of AIC layer 2/3 glutamatergic synapses, as only  
26 young adult, ethanol-naïve mice exhibited NMDAR-dependent long term depression *ex vivo*. Our  
27 findings also indicated that voluntary ethanol consumption alone can elicit glutamatergic plasticity in  
28 *vivo*. We found that the ratio of NMDAR- to AMPAR-mediated postsynaptic currents was reduced  
29 not only in CIE-treated, but also in air-treated, chronically drinking mice relative to ethanol-naïve  
30 controls. Furthermore, lower NMDA/AMPA ratios were predictive of greater escalation of ethanol  
31 consumption. These findings suggest that even moderate exposure to ethanol may elicit plasticity in  
32 the agranular insular cortex that contributes to the progression toward uncontrolled drinking.

33 **Keywords: electrophysiology, ethanol, glutamate, insular cortex, mice, synaptic plasticity**

## 34 **Introduction**

35 The Agranular Insular Cortex (AIC) is involved in interoceptive processing, and deficits in AIC  
36 functioning and interoceptive processing are implicated in alcohol use disorder (AUD)<sup>1-3</sup>. Despite  
37 evidence for altered insular functioning and/or output in animal models of AUD<sup>4-8</sup>, there has been  
38 minimal investigation of the effects of ethanol on synaptic transmission in the AIC<sup>9,10</sup>. It is  
39 axiomatic that synapses are ethanol-sensitive targets mediating the behavioral responses to ethanol,  
40 but the modulatory actions of ethanol on synaptic glutamate and gamma-aminobutyric acid (GABA)  
41 transmission have proven to vary by brain region. Thus, electrophysiological investigation of the  
42 effects of ethanol on the AIC is essential to uncover how AIC dysfunction occurs in the context of  
43 AUD.

44  
45 We recently demonstrated that components of glutamatergic transmission are targets for the acute  
46 actions of ethanol in the AIC<sup>9</sup>. Specifically, we found that N-methyl-D-aspartate receptor  
47 (NMDAR)-mediated synaptic transmission and NMDAR-dependent plasticity onto AIC layer 2/3  
48 pyramidal neurons were inhibited by acute ethanol at concentrations achieved during alcohol  
49 drinking. Prior work in several brain regions has shown that chronic ethanol produces long-term  
50 alterations in the synaptic targets of acute ethanol and that this ethanol-induced synaptic plasticity  
51 contributes to altered brain function as well as neural and behavioral components of AUD<sup>11,12</sup>.  
52 Therefore, we hypothesized that chronic ethanol exposure impairs AIC functioning by inducing  
53 glutamatergic synaptic adaptations.

54  
55 To test this hypothesis, we utilized the chronic intermittent ethanol (CIE) vapor paradigm to model in  
56 vivo ethanol exposure in mice. CIE is a passive exposure model that yields stable intoxicating blood  
57 alcohol concentrations over extended periods of time (16 hours per day), and mimics a pattern of  
58 repeated cycles of binge intoxication and withdrawal<sup>13,14</sup>. Prior research from our laboratory

59 observed that limited exposure to ethanol achieved via a single 4-day CIE treatment induces robust  
60 alterations in the polarity of NMDAR-dependent glutamatergic synaptic plasticity of medium spiny  
61 neurons in the nucleus accumbens shell in a cell-type specific manner<sup>15,16</sup>. Since repeated cycles of  
62 CIE result in enhanced volitional ethanol consumption by rodents<sup>13,14,17-19</sup>, these results are taken to  
63 indicate that even limited CIE exposure is sufficient to alter glutamatergic synaptic plasticity  
64 mechanisms, which may contribute to altered brain function and AUD-related pathology<sup>20</sup>. Here we  
65 used both limited and extended CIE treatment, alone (limited CIE experiment) or in conjunction with  
66 volitional consumption of ethanol (extended CIE experiments), to evaluate how chronic ethanol  
67 exposure affects glutamate synapses on layer 2/3 AIC pyramidal neurons. We found that repeated  
68 exposure to ethanol can impair NMDAR-mediated plasticity in the AIC, and that even volitional  
69 ethanol drinking is sufficient to induce glutamatergic synaptic plasticity in this region.

70

## 71 **Materials and Methods**

### 72 **Mice**

73 Adult ( $\geq 8$  weeks old) *Drd1a*-tdTomato BAC transgenic male mice<sup>21</sup>, either hemizygous or null  
74 carriers of the transgene, were used for all experiments. A colony of *Drd1a*-tdTomato mice (initial  
75 breeding pairs obtained from The Jackson Laboratory, (IMSR Cat# JAX:016204,  
76 RRID:IMSR\_JAX:016204) was maintained in the lab using matings in which only one parent carried  
77 the *Drd1a*-tdTomato transgene<sup>22</sup>. Mice were housed in standard cages (7.5" x 11.5" x 5") with Sani-  
78 Chips wood bedding (PJ Murphy) at  $\sim 22^{\circ}\text{C}$  with a 12:12 light:dark cycle (lights on, Zeitgeber time 0  
79 (ZT0), at 9:30 p.m.). Cages contained environmental enrichment in the form of a cotton fiber nestlet  
80 or a plastic hut. Water and standard chow (LabDiet@5LL2 Prolab RMH1800) were available ad  
81 libitum. All experimental procedures were approved by The University of Texas at Austin  
82 Institutional Animal Care and Use Committee, and were in accordance with the Guide for the Care  
83 and Use of Laboratory Animals as adopted by the National Institutes of Health.

84

## 85 **Chronic intermittent ethanol vapor exposure and two-bottle choice drinking**

86 Chronic intermittent ethanol (CIE) vapor exposure, with and without two-bottle choice (2BC) ethanol  
87 drinking, was performed as previously described<sup>15,17,19</sup>. Briefly, 95% ethanol (Pharmco-AAPER)  
88 was placed inside a sealed flask and volatilized by bubbling with air, supplied by an aquarium pump at  
89 a flow rate ~200-300 mL/min. The resulting ethanol vapor was combined with an additional stream  
90 of air (~3.5 L/min flow rate) and delivered to mice in vapor chamber units consisting of an airtight  
91 top, a vapor inlet, and an exhaust outlet (Allentown Inc., Allentown, NJ). Mice received  
92 intraperitoneal injections of ethanol (20% v/v) with pyrazole (1 mM) in phosphate buffered saline  
93 (PBS) immediately prior to placement in chamber units. At the start of each experiment, the loading  
94 dose was equivalent to 1.5 g/kg ethanol, 68.1 mg/kg pyrazole, but injection volumes (doses) and/or  
95 ethanol vapor flow rates were adjusted as needed to keep mice in the target BEC range of 150-200  
96 mg/dL. CIE mice were exposed to ethanol vapor for 16 hours (from ZT19.5 to ZT11.5 of the  
97 following day), followed by 8 hours of withdrawal, during which mice were removed from the vapor  
98 chambers and not exposed to ethanol. Each “bout” of CIE consisted of four consecutive days of  
99 vapor exposure (16 hours on/8 hours off). Air-treated mice were handled identically but injected  
100 with a solution of pyrazole (1 mM, 68.1 mg/kg) in PBS before being placed into vapor chamber units  
101 that received only air (flow rate  $\approx$  3.5 L/min).

102

103 The limited CIE experiment (Figure 1) utilized one bout of CIE (or air) treatment and mice were  
104 euthanized 24 hours after removal from chambers to prepare brain slices for electrophysiology. For  
105 extended CIE experiments (Figures 2, 4, 5, and 6), mice received three bouts of CIE (or air) treatment  
106 in conjunction with 2BC. The first bout of chambering was preceded by 21 days of daily, 2-hour,  
107 2BC drinking sessions in which home cage water bottles were replaced (from ZT11.5 to ZT13.5)  
108 with two bottles containing either tap water or 15% ethanol (Pharmco-AAPER) in tap water

109 (vol/vol). Bottles were weighed immediately before and after each session and the difference in  
110 weight was used to calculate consumption. The first and second bouts of chambering were followed  
111 by 3 days in which mice were left undisturbed and then 5 days of 2BC sessions. Following the third  
112 bout of chambering, mice were left undisturbed for 5-8 days and then were euthanized to prepare  
113 brain slices for electrophysiology. This duration of withdrawal from ethanol was selected because it  
114 corresponds to a period in which mice reliably exhibit CIE-induced enhancement of volitional  
115 ethanol consumption in our hands<sup>17,19</sup>.

116

117 In one of the extended CIE experiments (Figure 5), a handling control group was concurrently used.  
118 These mice were handled identically to mice in the other groups, but they remained ethanol naïve;  
119 that is, they underwent 2BC drinking sessions with water in both bottles and received air-treatment  
120 procedures during chambering.

121

## 122 **Blood ethanol concentrations**

123 Immediately upon removal from vapor chambers each day, tail blood samples were taken and blood  
124 ethanol concentrations (BECs) were determined using a gas chromatograph (Bruker 430-GC)  
125 equipped with a flame ionization detector and CombiPAL autosampler (Bruker Corporation,  
126 Fremont, CA). Mice were briefly restrained and two, 5  $\mu$ L, tail blood samples were collected. Each  
127 sample was immediately pipetted into a 10 mL vial containing 45  $\mu$ Ls of saturated sodium chloride  
128 solution. Vials were heated to 65 °C, and ethanol vapor was absorbed by a solid-phase micro  
129 extraction fiber (SPME; 75  $\mu$ m CAR/PDMS, fused silica; Supelco, Bellefonte, PA). A capillary  
130 column was the stationary phase (30 m x 0.53 mm x 1  $\mu$ m film thickness; Agilent Technologies,  
131 Santa Clara, CA), and helium was used as the mobile phase (at a flow rate of 8.5 mL/min).  
132 CompassCDS Workstation software (Bruker Corporation, Fremont, CA) was used to analyze ethanol

133 peaks, and external ethanol standards were included in every run to construct standard curves for  
134 interpolation of ethanol concentrations.

135

### 136 **Preparation of Brain Slices**

137 Mouse brains were rapidly extracted and coronal slices containing the most anterior portion of the  
138 AIC were collected via established laboratory protocols<sup>9</sup>. Briefly, mice were first anesthetized by  
139 inhalation of isoflurane and then euthanized by decapitation. Brains were then quickly extracted  
140 from the skull and submerged in ice-cold oxygenated artificial cerebrospinal fluid (ACSF) containing  
141 the following (in mM): 210 Sucrose, 26.2 NaHCO<sub>3</sub>, 1 NaH<sub>2</sub>PO<sub>4</sub>, 2.5 KCl, 11 dextrose, bubbled with  
142 95% O<sub>2</sub>/5% CO<sub>2</sub>. Coronal slices (250 to 270 μm thick) containing AIC were collected using a Leica  
143 VT1000S vibrating microtome (Leica Corp., Bannockburn, IL), which were then placed into an  
144 incubation solution containing the following (in mM): 120 NaCl, 25 NaHCO<sub>3</sub>, 1.23 NaH<sub>2</sub>PO<sub>4</sub>, 3.3  
145 KCl, 2.4 MgCl<sub>2</sub>, 1.8 CaCl<sub>2</sub>, 10 dextrose, continuously bubbled with 95% O<sub>2</sub>/ 5% CO<sub>2</sub>; 32°C, for at  
146 least 45 min for recovery prior to recording.

147

### 148 **Patch-Clamp Electrophysiology**

149 As previously described<sup>9</sup>, whole cell recordings were taken from layer 2/3 pyramidal AIC neurons  
150 identified via morphology (large, pyramidal-like shape) using a MRK200 Modular Imaging system  
151 (Siskiyou Corporation, Grants Pass, OR) mounted on a vibration isolation table. Recordings were  
152 made in ACSF containing (in mM): 120 NaCl, 25 NaHCO<sub>3</sub>, 1.23 NaH<sub>2</sub>PO<sub>4</sub>, 3.3 KCl, 1.2  
153 MgSO<sub>4</sub>, 2.0 CaCl<sub>2</sub>, and 10 dextrose unless otherwise noted, bubbled with 95% O<sub>2</sub>/ 5% CO<sub>2</sub>; 32°C,  
154 controlled by an in-line heater (Warner Instruments, Hamden, CT). Picrotoxin (50 μM) was included  
155 in the recording ACSF to block GABA<sub>A</sub> receptor-mediated synaptic currents. Brain slices were  
156 perfused at a rate of 2.0 mL/min. A P-97 Flaming/Brown model micropipette puller (Sutter  
157 Instruments, San Rafael, CA) was used to make recording electrodes (thin-wall glass, WPI

158 Instruments, Sarasota FL) of resistances from 3-6 M $\Omega$ . For all experiments, recording electrodes  
159 were filled with (in mM): 120 CsMeSO<sub>4</sub>, 15 CsCl, 8 NaCl, 10 HEPES, 0.2 EGTA, 10 TEA-Cl, 4  
160 Mg-ATP, 0.3 Na-GTP, 0.1 spermine, and 5 QX-314-Cl. Series resistance (R<sub>s</sub>) and holding current  
161 (I<sub>hold</sub>) were monitored throughout each experiment. Cells with R<sub>s</sub> of over 30 M $\Omega$  or that changed  
162 over 20% over the course of the experiment were excluded from the analysis. I<sub>hold</sub> was also used to  
163 identify recordings with significant instability of the patch and recordings with I<sub>hold</sub> in excess of -500  
164 pA for several minutes were excluded. One cell per brain slice was used for LTD experiments, and  
165 multiple cells per brain slice were sometimes used for other glutamatergic assays. All  
166 electrophysiology chemicals were obtained from either Fisher Scientific, Sigma-Aldrich, or Tocris  
167 Bioscience.

168  
169 An Axopatch 200B amplifier (Axon Instruments, Foster City, CA) was used to acquire all currents,  
170 which were filtered at 1 kHz, and digitized at 10-20 kHz via a Digidata 1440A interface board using  
171 pClamp 10.2 (Axon Instruments). Excitatory postsynaptic currents (EPSCs) were evoked with a  
172 stainless steel bipolar stimulating electrode (MX21AES, FHC, Inc., Bowdoin, ME, United States)  
173 placed approximately 500  $\mu$ m dorsomedial to the cell body. For LTD experiments, EPSCs were  
174 evoked for at least 10 min (at 0.025 Hz) to ensure stable recordings, followed by a low-frequency  
175 stimulation protocol consisting of 1 Hz stimulation for 15 minutes. Evoked EPSCs were then  
176 monitored for a 30 minute post-stimulation period at 0.025 Hz to test for the expression of LTD.  
177 Neurons were held at -70 mV for the entirety of LTD experiments. EPSC amplitudes were  
178 normalized by dividing each amplitude by the average baseline amplitude and the % baseline values  
179 were used for statistical analysis. The time courses for LTD experiments are presented with  
180 normalized data averaged in 2 min bins. Paired-pulse ratios were determined by applying two stimuli  
181 of equal intensity, separated by an interstimulus interval of 50 ms and calculated as the ratio of EPSC  
182 amplitudes (EPSC 2/EPSC 1). NMDA/AMPA ratios were calculated as the ratio of the EPSC



183 evoked at +40 mV holding potential, amplitude measured 50 ms after stimulation (NMDA), and the  
184 peak amplitude of the EPSC evoked at -80 mV (AMPA). Current-voltage (I-V) relationships and  
185 rectification of AMPAR-mediated currents were determined by stepping the command voltage over a  
186 range of potentials and evoking EPSCs in the presence of 100  $\mu$ M DL-APV. Rectification index was  
187 calculated as the EPSC amplitude evoked at +40 mV/EPSC amplitude at -80 mV.

188

## 189 **Data Analysis**

190 GraphPad Prism version 8.0 or higher was used to perform statistical analyses. Expression of LTD  
191 was determined by comparing the average normalized evoked EPSC amplitude during the 20 to 30  
192 minute period after the low-frequency stimulation protocol to the 10 minute baseline period using a  
193 one-sample t test with the theoretical mean equal to 100. Group comparisons of paired pulse ratio,  
194 NMDA/AMPA ratio, and rectification index were made using unpaired t-tests or 1-way ANOVA  
195 with Bonferroni post hoc tests, as appropriate. AMPAR I-V curves were compared between groups  
196 using an F-test to compare the linear fits of each curve. Relationships between ethanol consumption  
197 measures and NMDA/AMPA ratio were assessed using simple linear regression and Pearson  
198 correlation analyses. Statistical significance was defined as  $p < 0.05$ .

## 199 **Results**

### 200 **Expression of LTD following limited or extended ethanol experience**

201 We first tested whether limited CIE (1-bout) affected the expression of AIC glutamatergic LTD.  
202 Brain slices containing the AIC were prepared from mice 24 hours after limited (1-bout) CIE or air  
203 treatment, and layer 2/3 AIC neurons were tested for their response to a low frequency stimulation  
204 paradigm (1 Hz for 15 min) previously shown to induce NMDAR-dependent LTD of evoked  
205 EPSCs<sup>9</sup>. We found that LTD was produced in neurons from ethanol-naïve air-treated mice (Figure 1;  
206 one-sample t-test,  $t(7) = 3.3$ ,  $p = 0.014$ ). However, using this same stimulation paradigm, we were

207 unable to induce LTD in neurons from CIE mice 24 hours after the last ethanol vapor exposure  
208 (Figure 1; one-sample t-test,  $t(9) = 1.5$ ,  $p = 0.17$ ).

209

210 In the next set of experiments, we used an extended CIE protocol, which has been shown to enhance  
211 volitional ethanol drinking and produce ethanol dependence and withdrawal<sup>13,14,18</sup>. Mice were  
212 exposed to three bouts of either CIE or air treatment, with each bout preceded by 2BC drinking  
213 sessions (2BC + CIE and 2BC + Air groups, respectively; Figure 2A). Glutamatergic synaptic events  
214 were recorded from layer 2/3 AIC neurons *ex vivo* 5-8 days after the final CIE or air bout, a time  
215 period that corresponds to the point at which CIE-treated mice consistently exhibit enhanced 2BC  
216 ethanol drinking relative to air-treated mice<sup>17,19</sup>. As we observed following limited CIE exposure,  
217 neurons from 2BC + CIE mice did not exhibit LTD of evoked EPSCs in response to 1 Hz  
218 conditioning stimulation (one-sample t-test,  $t = 1.1$ ,  $p = 0.29$ ; Figure 2B,C). We also did not observe  
219 LTD in neurons from 2BC + Air mice (one-sample t-test,  $t = 1.2$ ,  $p = 0.28$ ; Figure 2B,C).

220

221 At face value, this pattern of results might seem to suggest that even volitional exposure to ethanol  
222 via 2BC drinking sessions is sufficient to disrupt LTD in layer 2/3 AIC neurons. However, the failure  
223 to observe LTD in the 2BC + Air group was unexpected, because similar studies of NMDAR-LTD  
224 have found that this form of LTD was still observable following 2BC + Air treatment<sup>17,19</sup>. NMDAR-  
225 LTD in the AIC has not been extensively characterized, but, in general, synaptic physiology and  
226 expression of plasticity can change from adolescence to adulthood, and even beyond the emergence  
227 of early adulthood<sup>23-27</sup>. Our prior work demonstrating the existence of this form of plasticity in the  
228 AIC<sup>9</sup>, and the limited CIE experiment of the present work, used animals that were younger in age  
229 (ranging from ~7-13 weeks) than those of the extended ethanol exposure experiment ( $\geq 15$  weeks).  
230 Thus, an alternative explanation for the absence of LTD in the 2BC + Air group of the extended  
231 ethanol exposure experiment might be the older age of the mice. To examine this possibility, we

232 determined whether we could induce LTD of evoked EPSCs in AIC layer 2/3 neurons from ethanol-  
233 naïve mice that were at least 15 weeks of age, using the same low frequency stimulation paradigm as  
234 before. Under these conditions, we did not observe LTD (Figure 3; one-sample t-test,  $t(11) = 0.06$ ,  $p$   
235  $= 0.96$ ). This finding suggests that the expression of this form of plasticity is an age-dependent  
236 phenomenon in layer 2/3 AIC neurons, and, furthermore, indicates that this assay cannot be used to  
237 evaluate ethanol-elicited synaptic adaptations in mice that are 15 weeks or older.

238

### 239 **Glutamatergic pre- and post-synaptic properties following extended ethanol experience**

240 Prior studies in other brain regions showing changes in the ability to induce LTD have suggested that  
241 this observation may indicate other phenomena, such as a change in NMDAR function or an increase  
242 in the proportion of calcium-permeable, to calcium-impermeable, AMPA receptors<sup>19,28</sup>. Therefore,  
243 we also determined whether 2BC + CIE differentially modulated other indices of glutamatergic  
244 synaptic transmission and plasticity relative to 2BC + Air (Figure 4A). We found no difference in  
245 the paired pulse ratio between 2BC + CIE and 2BC + Air mice (Figure 4B; unpaired t-test,  $t(15) =$   
246  $0.07$ ,  $p = 0.94$ ). We observed a significant reduction in the NMDA/AMPA ratio in the 2BC + CIE  
247 relative to the 2BC + Air mice (Figure 4C; unpaired t-test,  $t(16) = 2.9$ ,  $p = 0.0098$ ). Finally, the  
248 current-voltage relationship (Figure 4D; F test,  $F(2,76) = 0.72$ ,  $p = 0.49$ ) and the rectification index  
249 for evoked AMPAR currents (Figure 4E; unpaired t-test,  $t(27) = 1.21$ ,  $p = 0.24$ ) were not different  
250 between 2BC + CIE and 2BC + Air mice.

### 251 **Ethanol drinking alone suppresses NMDA/AMPA**

252 The reduced NMDA/AMPA ratio in the 2BC + CIE group, relative to the 2BC + Air group, suggests  
253 that this alteration in AIC function may relate to the progression toward pathological ethanol  
254 drinking. We wondered, though, whether drinking alone (without CIE) can impact NMDA/AMPA.  
255 Therefore, we replicated the extended CIE experiment with additional groups of 2BC + Air and 2BC

256 + CIE mice, along with a concurrent ethanol-naïve handling control group, “H<sub>2</sub>O + Air”, which was  
257 treated identically to the 2BC + Air group, but received water in both bottles during 2BC sessions  
258 (Figure 5A). In this set of experiments, we observed a main effect of group on the NMDA/AMPA  
259 ratio in layer 2/3 AIC neurons (one-way ANOVA,  $F(2, 27) = 5.4$ ,  $p = 0.011$ ), but the difference in  
260 NMDA/AMPA ratios between 2BC + Air and 2BC + CIE groups was not statistically significant ( $p =$   
261  $0.13$ , Bonferroni’s multiple comparisons test); Figure 5B,C. The results of both extended exposure  
262 experiments taken together strongly indicate that chronic ethanol experience suppresses the  
263 NMDA/AMPA ratio in layer 2/3 AIC pyramidal neurons, but this may not require CIE-induced  
264 dependence and can even occur in response to more moderate exposure to ethanol. To further  
265 examine the relationship between this glutamatergic adaptation and drinking behavior, we pooled the  
266 data from both experiments and assessed whether the NMDA/AMPA ratio was correlated with  
267 ethanol intake. We found that the relationship between an animal’s ultimate level of consumption and  
268 NMDA/AMPA ratio (Figure 6A) was modest and not statistically significant (Pearson’s  $r = -0.34$ ,  $p$   
269  $= 0.10$ ). However, the relationship between the degree to which an animal escalated in consumption  
270 of ethanol over the course of the experiment and the NMDA/AMPA ratio was evident (Pearson’s  $r =$   
271  $-0.52$ ,  $p = 0.02$ ), with escalation of drinking being inversely correlated to NMDA/AMPA ratio;  
272 Figure 6B.

273

## 274 **Discussion**

275 Chronic ethanol exposure disrupts the normal functioning of prefrontal cortical regions via long-term  
276 adaptations of neuronal electrophysiological activity<sup>29–34</sup>. These neuroadaptations may reveal, at  
277 least in part, how various cortically mediated cognitive-behavioral processes, such response  
278 inhibition and reversal learning, are disrupted in individuals with AUD<sup>30,33</sup>. Likewise, it has been  
279 shown that insula-dependent interoceptive processes are involved in aspects of AUD<sup>1–3</sup>, indicating  
280 that homeostatic physiology in this cortical region is also disrupted by chronic ethanol exposure. Our

281 previous investigation of AIC layer 2/3 pyramidal neurons found that NMDAR-dependent  
282 transmission and glutamatergic synaptic plasticity are acutely disrupted by ethanol<sup>9</sup>. Therefore, the  
283 goal of the present work was to test whether chronic ethanol also alters AIC function via effects on  
284 glutamatergic synaptic transmission.

285

286 We found that following passive exposure to ethanol (limited CIE treatment) we did not observe  
287 LTD ex vivo when tested 24 hours into ethanol withdrawal under conditions that elicited NMDAR-  
288 dependent LTD in AIC neurons from control mice. Since the CIE vapor model of ethanol  
289 administration reproduces several behavioral and physiological aspects of AUD<sup>18</sup>, it is possible that  
290 disruption of NMDAR-dependent LTD may be a signature of altered AIC functioning as ethanol  
291 consumption shifts from controlled to problematic (AUD-like). Such a finding would not be without  
292 precedence, as many groups have found, in other addiction-relevant brain regions, alterations in  
293 NMDAR-dependent plasticity that were linked to ethanol-related behaviors<sup>17,22,35,36</sup>. However, it is  
294 also possible that the observed disruption in AIC LTD has no relevance to ethanol-related behavior,  
295 and, rather, is a general consequence of ethanol withdrawal unrelated to the pathology of AUD.  
296 Indeed, Spiga and colleagues have suggested that the disruption of NMDAR-dependent LTD might  
297 be ubiquitous at excitatory synapses across several brain regions as a result of ethanol withdrawal<sup>37</sup>.

298

299 Therefore, we next employed additional bouts of CIE along with 2BC drinking to determine whether  
300 the disruption of AIC NMDAR-dependent LTD induced by passive exposure to high doses of ethanol  
301 is linked to ethanol-reinforced behavior. After extended ethanol experience, neither the 2BC + CIE  
302 nor the 2BC + Air group displayed LTD in response to conditioning stimulation. One possible  
303 interpretation of this finding is that NMDAR-LTD in the AIC is more sensitive to ethanol exposure  
304 than it is in other brain regions<sup>17,19</sup>, and that extended 2BC drinking alone was sufficient to disrupt  
305 LTD in this region. However, we sought to rule out other factors that could explain this unexpected

306 result. Mice in the limited CIE experiment ranged from 8-11 weeks of age, while mice in extended  
307 exposure experiment were  $\geq 15$  weeks old. It is generally thought that adulthood starts for mice  
308 around postnatal day 60<sup>38</sup>, and so at first impression differences in mice from these different periods  
309 of adulthood may not appear important for experimental design. However, there is literature  
310 indicating that synaptic properties are at least partly age-dependent<sup>23,24</sup> and can change even over the  
311 course of adulthood<sup>25-27</sup>. In our previous report, we were the initial group to demonstrate AIC  
312 NMDAR-dependent LTD using whole-cell voltage clamp electrophysiology in mice aged 7-13  
313 weeks<sup>9</sup> and we did not test whether this form of plasticity is age-dependent. Here we discovered that  
314 the same synaptic conditioning stimulation that elicits LTD in AIC layer 2/3 neurons from young  
315 adult mice (~8-11 weeks old) did not do so in neurons from mice that were at least 15 weeks old.  
316 This suggests that the expression of NMDAR-dependent LTD in the AIC may be an age-dependent  
317 phenomenon, or that different stimulation parameters are required to induce LTD in older mice. In  
318 either case, the specific LTD assay we employed (which used 15 minutes of 1 Hz stimulation)  
319 appears to only be suitable for probing AIC glutamatergic adaptations in mice of a specific age range.

320

321 Since chronic ethanol has been shown to alter multiple aspects of glutamatergic synaptic  
322 transmission<sup>12,39</sup>, we evaluated whether extended CIE treatment of ethanol drinking mice affected  
323 measures of presynaptic glutamate release and post-synaptic signaling by AMPA and NMDA  
324 receptors, relative to air treatment of ethanol drinking mice. It is generally accepted that acute  
325 ethanol is an inhibitor of excitatory signaling, but chronic ethanol increases excitatory drive by  
326 increasing glutamatergic transmission onto neurons<sup>11</sup>. However, when comparing groups of  
327 drinking mice (2BC + CIE and 2BC + Air), we found no evidence that CIE affected presynaptic  
328 glutamate release probability onto AIC 2/3 pyramidal neurons as there was no difference in the  
329 paired pulse ratio. To assess postsynaptic function, we tested for a difference in the expression of  
330 calcium-permeable AMPA receptors (CPARS), which have been shown to be increased in several

331 brain regions after exposure to ethanol and other drugs of abuse and are implicated in the escalation  
332 of seeking and intake of ethanol and other drugs<sup>39</sup>. We did not observe that CIE altered postsynaptic  
333 CPAR expression relative to air treatment, as AMPAR rectification index and I/V curves did not  
334 differ between groups.

335

336 We did, however, find in this set of experiments that the NMDA/AMPA ratio, a commonly used  
337 index of glutamatergic synaptic transmission and plasticity, was significantly reduced in 2BC + CIE  
338 mice relative to 2BC + Air mice. This observation prompted a subsequent set of experiments that  
339 included an ethanol-naïve handling control group, leading to our main finding – that drinking ethanol  
340 alone can alter the NMDA/AMPA ratio in layer 2/3 AIC pyramidal neurons. Since exposure to  
341 chronic ethanol has frequently been shown to lead to enhanced glutamatergic transmission via  
342 increased NMDAR function and NMDAR-mediated signaling<sup>11,12,40,41</sup>, we were initially surprised  
343 that ethanol exposure resulted in a suppressed NMDA/AMPA ratio in our experiments. Furthermore,  
344 although there is evidence that chronic ethanol also upregulates the expression and functioning of  
345 AMPA receptors, this generally has been shown to be at a lower level than that of NMDA  
346 receptors<sup>11,12,42,43</sup>. Therefore, at initial glance, our findings were perplexing as we expected a priori  
347 to observe an enhanced NMDA/AMPA ratio due to increased NMDAR expression and function  
348 accompanied by possible, but less significant, changes in AMPAR expression and function.  
349 However, it is becomingly increasingly clear that the effects of chronic ethanol on postsynaptic  
350 glutamate receptors depend upon the brain region investigated and the time point after ethanol  
351 withdrawal<sup>30,33,44,45</sup>. To better understand whether the difference in ratio we observed in our  
352 experiments resulted from changes in AMPARs, NMDARs, or both, additional follow-up  
353 electrophysiological assessments of isolated NMDAR-mediated and AMPAR-mediated input-output  
354 curves at this time point are warranted, as are biochemical approaches investigating whether changes  
355 in NMDAR and AMPAR subunit composition co-occur with this synaptic phenotype.

356

357 Finally, we found that although CIE vapor treatment tended to cause a greater suppression of the  
358 NMDA/AMPA ratio, ethanol drinking alone was sufficient to elicit this adaptation. The fact that the  
359 NMDA/AMPA ratio was suppressed in the 2BC + Air group, relative to ethanol naïve controls,  
360 indicates that glutamatergic synaptic changes in layer 2/3 AIC pyramidal neurons occur prior to the  
361 development of excessive drinking behavior. Interestingly, escalation of ethanol consumption,  
362 regardless of whether mice were treated with CIE, was correlated with plasticity as indexed by the  
363 NMDA/AMPA ratio – mice with lower ratios were those that had exhibited greater increases in the  
364 dose of ethanol self-administered over the course of the experiment. This set of findings,  
365 summarized in Figure 7, raises the question of whether even moderate ethanol exposure may have  
366 consequences that are relevant to other behavioral manifestations of cortical glutamatergic synaptic  
367 plasticity. For example, glutamatergic synaptic plasticity mechanisms in the insula have been shown  
368 to encode for phenotypes produced by models of neuropathic pain, as well as regulate the rate of  
369 conditioned taste aversion learning<sup>46-48</sup>. From this perspective, it would be an invaluable  
370 investigation to determine whether the glutamatergic synaptic changes in the 2BC + Air exposure  
371 paradigm are enough to modulate the expression of neuropathic pain as well as the extinction of  
372 conditioned taste aversion<sup>46-48</sup>. Moreover, ethanol has well-documented aversive properties, and the  
373 reduction in sensitivity to the aversive aspects of ethanol consumption have been increasingly  
374 recognized as a component of the addiction cycle for ethanol<sup>49</sup>. It has been shown that a single 24  
375 hour experience in a two-bottle choice paradigm enhances consumption of ethanol adulterated with  
376 the bitter tastant quinine, but does not change quinine palatability<sup>50</sup>. Therefore, it could be that, in  
377 some mice, even early ethanol exposure or moderate doses of ethanol elicit glutamatergic synaptic  
378 plasticity in the insula and thereby disrupt interoceptive processing of aversive stimuli. Thus, one  
379 intriguing hypothesis suggested by our findings is that ethanol-elicited adaptation in AIC



380 glutamatergic transmission may cause a suppression of aversive processing and thereby facilitate  
381 escalation of ethanol consumption.

382

### 383 **Authors contribution**

384 JS, RMa, and RMo conceived and designed experiments. JS performed the experiments. JS and  
385 RMa analyzed the data and interpreted the results. JS and RMa wrote the paper. HA and DC  
386 conducted breeding of animals and assisted with animal behavior.

387

### 388 **Funding**

389 This work was supported by NIAAA awards R01AA015167 and U24AA016651 (RMo and RMa),  
390 and the Homer Lindsey Bruce and Fred Murphy Jones endowed graduate fellowships (JS).

391

### 392 **Data availability statement**

393 The data that support the findings of this study are available from the corresponding author upon  
394 reasonable request.

395

### 396 **Acknowledgments**

397 The authors wish to thank Dr. Rueben Gonzales for contributing to critical discussions of this work.  
398 The graphical abstract was created with BioRender.com. The authors declare that the research was  
399 conducted in the absence of any commercial or financial relationships that could be construed as a  
400 potential conflict of interest.

## 401 Reference List

- 402 1. Naqvi NH, Bechara A. The insula and drug addiction: an interoceptive view of pleasure, urges,  
403 and decision-making. *Brain Struct Funct.* 2010;214(5-6):435-450. doi:10.1007/s00429-010-  
404 0268-7
- 405 2. Paulus MP, Stewart JL. Interoception and drug addiction. *Neuropharmacology.*  
406 2014;76(PART B). doi:10.1016/j.neuropharm.2013.07.002
- 407 3. Ateş Çöl I, Sönmez MB, Vardar ME. Alkol Bağımlısı Olan Hastalarda İçsel Farkındalığın  
408 Değerlendirilmesi = Evaluation of interoceptive awareness in alcohol-addicted patients.  
409 *Nöropsikiyatri Arşivi.* 2016;53(1).
- 410 4. Seif T, Chang S-J, Simms JA, et al. Cortical activation of accumbens hyperpolarization-active  
411 NMDARs mediates aversion-resistant alcohol intake. *Nat Neurosci.* 2013;16(8):1094-1100.  
412 doi:10.1038/nn.3445
- 413 5. Jaramillo AA, Randall PA, Frisbee S, Besheer J. Modulation of sensitivity to alcohol by  
414 cortical and thalamic brain regions. *Eur J Neurosci.* 2016;44(8):2569-2580.  
415 doi:10.1111/ejn.13374
- 416 6. Jaramillo AA, Randall PA, Stewart S, Fortino B, Van Voorhies K, Besheer J. Functional role  
417 for cortical-striatal circuitry in modulating alcohol self-administration. *Neuropharmacology.*  
418 2018;130:42-53. doi:10.1016/j.neuropharm.2017.11.035
- 419 7. Jaramillo AA, Van Voorhies K, Randall PA, Besheer J. Silencing the insular-striatal circuit  
420 decreases alcohol self-administration and increases sensitivity to alcohol. *Behav Brain Res.*  
421 2018;348(February):74-81. doi:10.1016/j.bbr.2018.04.007
- 422 8. Scuppa G, Tambalo S, Pfarr S, Sommer WH, Bifone A. Aberrant insular cortex connectivity  
423 in abstinent alcohol-dependent rats is reversed by dopamine D3 receptor blockade. *Addict*  
424 *Biol.* 2020;25(3). doi:10.1111/adb.12744
- 425 9. Shillinglaw JE, Morrisett RA, Mangieri RA. Ethanol Modulates Glutamatergic Transmission  
426 and NMDAR-Mediated Synaptic Plasticity in the Agranular Insular Cortex.  
427 2018;9(December). doi:10.3389/fphar.2018.01458
- 428 10. McGinnis MM, Parrish BC, McCool BA. Withdrawal from chronic ethanol exposure increases  
429 postsynaptic glutamate function of insular cortex projections to the rat basolateral amygdala.  
430 *Neuropharmacology.* 2020;172(April):108129. doi:10.1016/j.neuropharm.2020.108129
- 431 11. Lovinger DM, Roberto M. Synaptic Effects Induced by Alcohol. In: *Current Topics in*  
432 *Behavioral Neurosciences.* Springer-Verlag; 2011:31-86. doi:10.1007/7854\_2011\_143
- 433 12. Roberto M, Varodayan FP. Synaptic targets: Chronic alcohol actions. *Neuropharmacology.*  
434 2017;122:85-99. doi:10.1016/j.neuropharm.2017.01.013
- 435 13. Becker HC, Lopez MF. Increased ethanol drinking after repeated chronic ethanol exposure and  
436 withdrawal experience in C57BL/6 mice. *Alcohol Clin Exp Res.* 2004;28(12):1829-1838.
- 437 14. Lopez MF, Becker HC. Effect of pattern and number of chronic ethanol exposures on  
438 subsequent voluntary ethanol intake in C57BL/6J mice. *Psychopharmacol.* 2005;181(4):688-  
439 696. doi:10.1007/s00213-005-0026-3
- 440 15. Renteria R, Maier EY, Buske TR, Morrisett RA. Selective Alterations of NMDAR Function  
441 and Plasticity in D1 and D2 Medium Spiny Neurons in the Nucleus Accumbens Shell  
442 Following Chronic Intermittent Ethanol Exposure. *Neuropharmacology.* 2017;112(Pt A):164-

- 443 171. doi:10.1016/j.neuropharm.2016.03.004
- 444 16. Jeanes ZM, Buske TR, Morrisett RA. Cell type-specific synaptic encoding of ethanol exposure  
445 in the nucleus accumbens shell. *Neuroscience*. 2014;277:184-195.  
446 doi:10.1016/j.neuroscience.2014.06.063
- 447 17. Kircher DM, Aziz H, Mangieri RA, Morrisett RA. Ethanol Experience Enhances  
448 Glutamatergic Ventral Hippocampal Inputs To D1 Receptor-Expressing Medium Spiny  
449 Neurons In The Nucleus Accumbens Shell. *J Neurosci*. 2019;39(13):3051-18.  
450 doi:10.1523/jneurosci.3051-18.2019
- 451 18. Griffin WC. Alcohol dependence and free-choice drinking in mice. *Alcohol*. 2014;48(3):287-  
452 293. doi:10.1016/j.alcohol.2013.11.006
- 453 19. Renteria R, Buske TR, Morrisett RA. Long-term subregion-specific encoding of enhanced  
454 ethanol intake by D1DR medium spiny neurons of the nucleus accumbens. *Addict Biol*.  
455 2017;1-10. doi:10.1111/adb.12526
- 456 20. Renteria R, Jeanes ZM, Mangieri RA, et al. Using In Vitro Electrophysiology to Screen  
457 Medications: Accumbal Plasticity as an Engram of Alcohol Dependence. *Int Rev Neurobiol*.  
458 2016;126:441-465. doi:10.1016/bs.irm.2016.02.018
- 459 21. Ade KK, Wan Y, Chen M, Gloss B, Calakos N. An Improved BAC Transgenic Fluorescent  
460 Reporter Line for Sensitive and Specific Identification of Striatonigral Medium Spiny  
461 Neurons. *Front Syst Neurosci*. 2011;5:32. doi:10.3389/fnsys.2011.00032
- 462 22. Mangieri RA, Maier EY, Buske TR, Lasek AW, Morrisett RA. Anaplastic lymphoma kinase is  
463 a regulator of alcohol consumption and excitatory synaptic plasticity in the nucleus accumbens  
464 shell. *Front Pharmacol*. 2017;8(AUG). doi:10.3389/fphar.2017.00533
- 465 23. McCutcheon JE, Marinelli M. Age matters. *Eur J Neurosci*. 2009;29(5). doi:10.1111/j.1460-  
466 9568.2009.06648.x
- 467 24. Jackson SJ, Andrews N, Ball D, et al. Does age matter? The impact of rodent age on study  
468 outcomes. *Lab Anim*. 2017;51(2). doi:10.1177/0023677216653984
- 469 25. Barnes CA. Memory deficits associated with senescence: A neurophysiological and behavioral  
470 study in the rat. *J Comp Physiol Psychol*. 1979;93(1). doi:10.1037/h0077579
- 471 26. Lynch G, Rex CS, Gall CM. Synaptic plasticity in early aging. *Ageing Res Rev*. 2006;5(3).  
472 doi:10.1016/j.arr.2006.03.008
- 473 27. Foster TC. Involvement of hippocampal synaptic plasticity in age-related memory decline.  
474 *Brain Res Rev*. 1999;30(3). doi:10.1016/S0165-0173(99)00017-X
- 475 28. Lim BK, Huang KW, Grueter BA, Rothwell PE, Malenka RC. Anhedonia requires MC4R-  
476 mediated synaptic adaptations in nucleus accumbens. *Nature*. 2012;487(7406):183-189.  
477 doi:10.1038/nature11160
- 478 29. Varodayan FP, Sidhu H, Kreifeldt M, Roberto M, Contet C. Morphological and functional  
479 evidence of increased excitatory signaling in the prelimbic cortex during ethanol withdrawal.  
480 *Neuropharmacology*. 2018;133:470-480. doi:10.1016/j.neuropharm.2018.02.014
- 481 30. Kroener S, Mulholland PJ, New NN, Gass JT, Becker HC, Chandler LJ. Chronic alcohol  
482 exposure alters behavioral and synaptic plasticity of the rodent prefrontal cortex. *PLoS One*.  
483 2012;7(5):e37541. doi:10.1371/journal.pone.0037541
- 484 31. Pleil KE, Lowery-Gionta EG, Crowley NA, et al. Effects of chronic ethanol exposure on  
485 neuronal function in the prefrontal cortex and extended amygdala. *Neuropharmacology*.

- 486 2015;99:735-749. doi:10.1016/j.neuropharm.2015.06.017
- 487 32. Cannady R, Nimitvilai-Roberts S, Jennings SD, Woodward JJ, Mulholland PJ. Distinct  
488 Region- and Time-Dependent Functional Cortical Adaptations in C57BL/6J Mice after Short  
489 and Prolonged Alcohol Drinking. *eNeuro*. 2020;7(3):1-15. doi:10.1523/ENEURO.0077-  
490 20.2020
- 491 33. Nimitvilai S, Lopez MF, Mulholland PJ, Woodward JJ. Chronic Intermittent Ethanol Exposure  
492 Enhances the Excitability and Synaptic Plasticity of Lateral Orbitofrontal Cortex Neurons and  
493 Induces a Tolerance to the Acute Inhibitory Actions of Ethanol. *Neuropsychopharmacology*.  
494 2016;41(4). doi:10.1038/npp.2015.250
- 495 34. Holmes A, Fitzgerald PJ, MacPherson KP, et al. Chronic alcohol remodels prefrontal neurons  
496 and disrupts NMDAR-mediated fear extinction encoding. *Nat Neurosci*. 2012;15(10):1359-  
497 1361. doi:10.1038/nn.3204
- 498 35. McCool BA. Ethanol modulation of synaptic plasticity. *Neuropharmacology*.  
499 2011;61(7):1097-1108. doi:10.1016/j.neuropharm.2010.12.028
- 500 36. Abrahao KP, Ariwodola OJ, Butler TR, et al. Locomotor sensitization to ethanol impairs  
501 NMDA receptor-dependent synaptic plasticity in the nucleus accumbens and increases ethanol  
502 self-administration. *J Neurosci*. 2013;33(11):4834-4842. doi:10.1523/JNEUROSCI.5839-  
503 11.2013
- 504 37. Spiga S, Talani G, Mulas G, et al. Hampered long-term depression and thin spine loss in the  
505 nucleus accumbens of ethanol-dependent rats. *Proc Natl Acad Sci U S A*. 2014:1-10.  
506 doi:10.1073/pnas.1406768111
- 507 38. Semple BD, Blomgrem K, Gimlin K, Ferriero D, Noble-Haeusslein L. Brain development in  
508 rodents and humans: Identifying benchmarks of maturation and vulnerability to injury across  
509 species. *Prog Neurobiol*. 2013;0:1-16. doi:10.1016/j.pneurobio.2013.04.001
- 510 39. Woodward Hopf F, Mangieri RA. Do Alcohol-Related AMPA-Type Glutamate Receptor  
511 Adaptations Promote Intake? In: *Handbook of Experimental Pharmacology*. ; 2018:157-186.  
512 doi:10.1007/164\_2018\_105
- 513 40. Grover CA, Wallace KA, Lindberg SA, Frye GD. Ethanol inhibition of NMDA currents in  
514 acutely dissociated medial septum/diagonal band neurons from ethanol dependent rats. *Brain*  
515 *Res*. 1998;782(1-2). doi:10.1016/S0006-8993(97)01001-9
- 516 41. Gulya K, Grant KA, Valverius P, Hoffman PL, Tabakoff B. Brain regional specificity and  
517 time-course of changes in the NMDA receptor-ionophore complex during ethanol withdrawal.  
518 *Brain Res*. 1991;547(1). doi:10.1016/0006-8993(91)90583-H
- 519 42. Smothers CT, Mrotek JJ, Lovinger DM. Chronic ethanol exposure leads to a selective  
520 enhancement of N-methyl- D-aspartate receptor function in cultured hippocampal neurons. *J*  
521 *Pharmacol Exp Ther*. 1997;283(3).
- 522 43. Chandler LJ, Sutton G, Norwood D, Sumners C, Crews FT. Chronic ethanol increases N-  
523 Methyl-D-aspartate-stimulated nitric oxide formation but not receptor density in cultured  
524 cortical neurons. *Mol Pharmacol*. 1997;51(5). doi:10.1124/mol.51.5.733
- 525 44. Trantham-Davidson H, Burnett EJ, Gass JT, et al. Chronic alcohol disrupts dopamine receptor  
526 activity and the cognitive function of the medial prefrontal cortex. *J Neurosci*. 2014;34(10).  
527 doi:10.1523/JNEUROSCI.0623-13.2014
- 528 45. McGuier NS, Padula AE, Lopez MF, Woodward JJ, Mulholland PJ. Withdrawal from chronic  
529 intermittent alcohol exposure increases dendritic spine density in the lateral orbitofrontal

- 530 cortex of mice. *Alcohol*. 2015;49(1). doi:10.1016/j.alcohol.2014.07.017
- 531 46. Qiu S, Chen T, Koga K, et al. An increase in synaptic NMDA receptors in the insular cortex  
532 contributes to neuropathic pain. *Sci Signal*. 2013;6(275). doi:10.1126/scisignal.2003778
- 533 47. Liu MG, Zhuo M. Loss of long-term depression in the insular cortex after tail amputation in  
534 adult mice. *Mol Pain*. 2014;10(1). doi:10.1186/1744-8069-10-1
- 535 48. Rodríguez-Durán LF, Martínez-Moreno A, Escobar ML. Bidirectional modulation of taste  
536 aversion extinction by insular cortex LTP and LTD. *Neurobiol Learn Mem*. 2017;142.  
537 doi:10.1016/j.nlm.2016.12.014
- 538 49. Haass-Koffler CL, Perciballi R. Alcohol Tolerance in Human Laboratory Studies for  
539 Development of Medications to treat Alcohol Use Disorder. *Alcohol Alcohol*. 2020;55(2):129-  
540 135. doi:10.1093/alcalc/agz103
- 541 50. Lei K, Wegner SA, Yu JH, Simms JA, Hopf FW. A single alcohol drinking session is  
542 sufficient to enable subsequent aversion-resistant consumption in mice. *Alcohol*. 2016;55.  
543 doi:10.1016/j.alcohol.2016.07.008

544

545

## 546 **Figure Legends**

547 Figure 1. Limited exposure to CIE disrupts LTD expression at glutamatergic synapses onto AIC  
548 layer 2/3 pyramidal neurons. (A) Timeline for limited CIE (or air) exposure prior to ex vivo  
549 electrophysiological recordings. (B) Representative traces from a single neuron of each group  
550 showing evoked EPSCs before (“Baseline”), and 20-30 min after (“Post-Conditioning”), stimulation  
551 protocol (900 pulses at 1 Hz while holding the neuron at -70 mV). (C) Conditioning stimulation  
552 induced LTD in Air-treated (n = 8 neurons/8 slices/8 mice; \*, p = 0.014 post-conditioning period  
553 versus baseline), but not CIE-treated mice 24 hours into withdrawal (n = 10 neurons/8 slices/8 mice).  
554 Values are expressed as averages  $\pm$  S.E.M.

555 Figure 2. Extended CIE exposure with ethanol drinking, and extended air exposure with ethanol  
556 drinking, are accompanied by an absence of LTD expression in AIC layer 2/3 pyramidal neurons.  
557 (A) Timeline for extended CIE (or air) exposure and two-bottle choice (2BC) ethanol drinking (15%  
558 ethanol or water) prior to ex vivo electrophysiological recordings. Brown fill indicates days when  
559 mice were left unperturbed in home cages. (B) Conditioning stimulation did not induce LTD of  
560 evoked EPSCs onto AIC layer 2/3 pyramidal neurons of 2BC + Air (n = 8 neurons/8 slices/6 mice) or  
561 2BC + CIE (n = 8 neurons/8 slices/7 mice) mice. (C) Representative traces from a single neuron of  
562 each group showing evoked EPSCs before (“Baseline”), and 20-30 min after (“Post-Conditioning”),  
563 stimulation protocol. Values are expressed as averages  $\pm$  S.E.M.

564 Figure 3. LTD at glutamatergic synapses onto AIC layer 2/3 pyramidal neurons is not observed in  
565 slices from ethanol-naïve mice that are at least 15 weeks old. (A) Representative traces from a single  
566 neuron showing evoked EPSCs before (“Baseline”), and 20-30 min after (“Post-Conditioning”),  
567 stimulation protocol. (B) Conditioning stimulation did not induce LTD of evoked EPSCs onto AIC

568 layer 2/3 pyramidal neurons from mice that were at least 15 weeks old (n = 12 neurons/12 slices/8  
569 mice). Values are expressed as averages  $\pm$  S.E.M.

570 Figure 4. Extended exposure to CIE and ethanol drinking reduces NMDA/AMPA ratio in AIC layer  
571 2/3 pyramidal neurons, but does not alter the expression of other glutamatergic electrophysiological  
572 properties, relative to an air exposed, ethanol drinking group. (A) Timeline for extended CIE (or air)  
573 exposure and two-bottle choice (2BC) ethanol drinking (15% ethanol or water) prior to ex vivo  
574 electrophysiological recordings. Brown fill indicates days when mice were left unperturbed in home  
575 cages. (B) Paired pulse ratio (second evoked EPSC amplitude/ first evoked EPSC amplitude) did not  
576 differ between 2BC + Air (n = 8 neurons/7 slices/7 mice) and 2BC + CIE mice (n = 9 neurons/8  
577 slices/4 mice). (C) NMDA/AMPA ratio was decreased in 2BC + CIE (n = 9 neurons/9 slices/5 mice)  
578 relative to 2BC + Air mice (n = 9 neurons/9 slices/5 mice). \*\*, p = 0.0098, 2BC + CIE vs. 2BC +  
579 Air. (D) Current-voltage relationship of AMPAR-mediated EPSCs for 2BC + Air (n = 10 neurons/10  
580 slices/6 mice) and 2BC + CIE mice (n = 6 neurons/6 slices/4 mice). (E) No difference in the  
581 rectification index (ratio of EPSC amplitudes evoked at +40 mV and -80 mV holding potentials) was  
582 observed between 2BC + Air (n = 13 neurons/13 slices/6 mice) and 2BC + CIE mice (n = 16  
583 neurons/15 slices/8 mice). Values are expressed as averages  $\pm$  S.E.M.

584 Figure 5. Extended ethanol exposure reduces NMDA/AMPA ratio in AIC layer 2/3 pyramidal  
585 neurons. (A) Timeline for extended CIE (or air) exposure with two-bottle choice ethanol drinking  
586 (15% ethanol or water), or extended air exposure with water drinking (handling control group, “H<sub>2</sub>O-  
587 Air”), prior to ex vivo electrophysiological recordings. Brown fill indicates days when mice were  
588 left unperturbed in home cages. (B) Representative traces from a single neuron of each group  
589 showing evoked NMDA/AMPA ratio. (C) NMDA/AMPA ratio was altered by ethanol exposure (p =  
590 0.011, 1-way ANOVA) and significantly decreased in 2BC + CIE mice relative to H<sub>2</sub>O + Air mice

591 (\*,  $p = 0.014$ , Bonferroni post-hoc comparison). H<sub>2</sub>O + Air,  $n = 14$  neurons/9 slices/5 mice; 2BC +  
592 Air,  $n = 8$  neurons/5 slices/2 mice; 2BC + CIE,  $n = 8$  neurons/4 slices/3 mice.

593 Figure 6. Relationships between ethanol drinking measures and NMDA/AMPA ratio in AIC layer 2/3  
594 pyramidal neurons. Data from the 2BC + CIE and 2BC + Air groups shown in Figures 4 and 5 were  
595 combined and an average NMDA/AMPA ratio was calculated for each mouse. (A) NMDA/AMPA  
596 ratio versus average ethanol consumption (g ethanol per kg body weight) during the final five 2BC  
597 sessions. (B) NMDA/AMPA ratio versus escalation index. The escalation index expresses each  
598 animal's change in ethanol consumption relative to its initial consumption, and was calculated as  
599  $(\text{final g/kg} - \text{initial g/kg})/\text{initial g/kg}$  using 5-session averages of the final five and initial five 2BC  
600 sessions. Dashed and dotted lines indicate plots of the best-fit lines and 95% confidence intervals,  
601 respectively. Correlation coefficients are indicated on each graph. \*,  $p = 0.02$ , Pearson  $r$ .

602 Figure 7. Ethanol-induced plasticity in layer 2/3 agranular insular cortex predicts escalation of  
603 ethanol consumption. Both 2BC + Air (middle) and 2BC + CIE (bottom) groups showed a  
604 suppression of the NMDA/AMPA ratio relative to ethanol-naïve controls (top). Regardless of  
605 treatment group, the NMDA/AMPA ratio in layer 2/3 pyramidal neurons was inversely related to  
606 change in drinking over time.



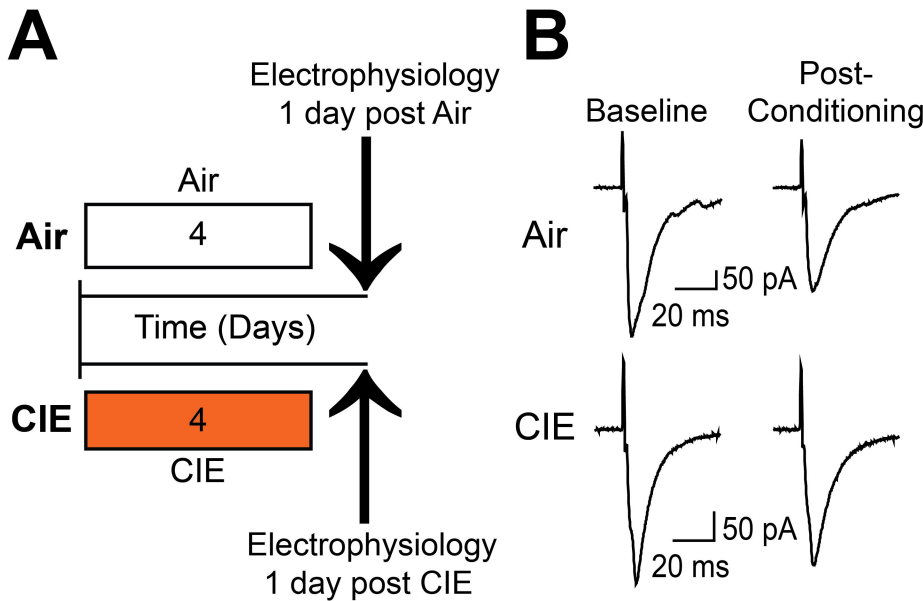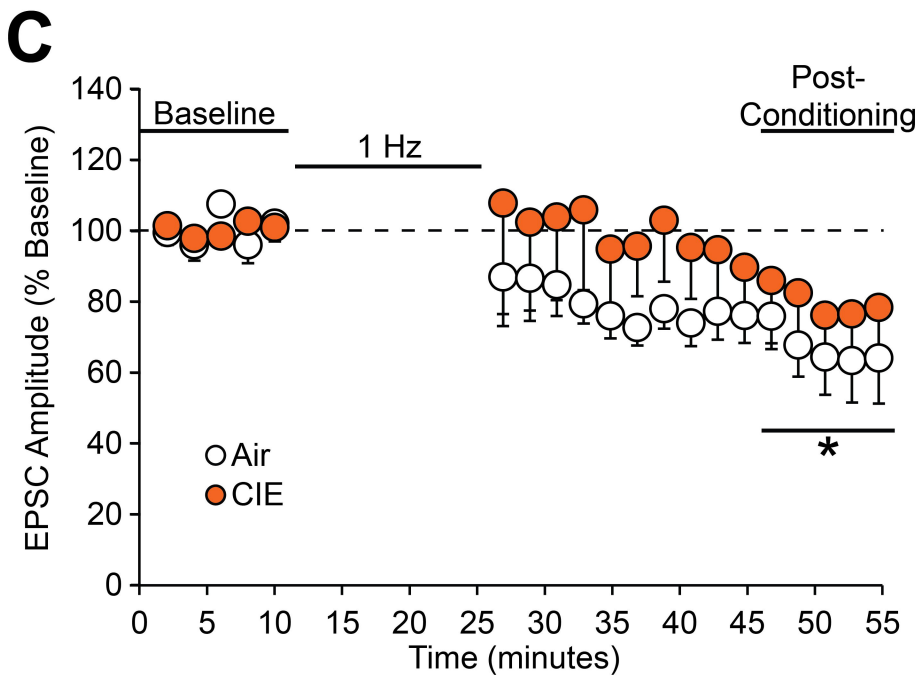

**A**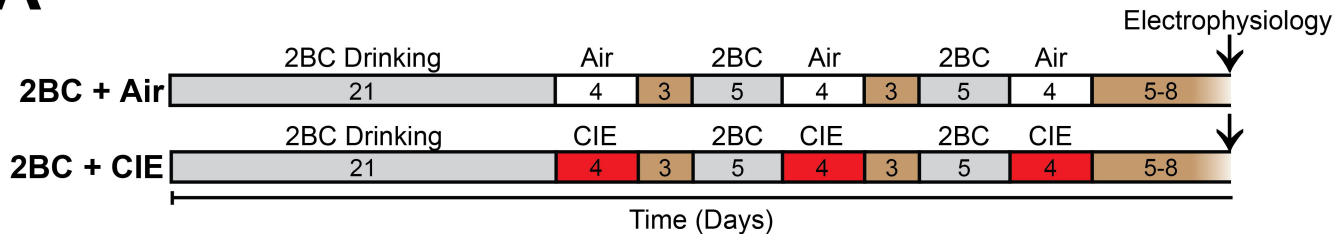**B**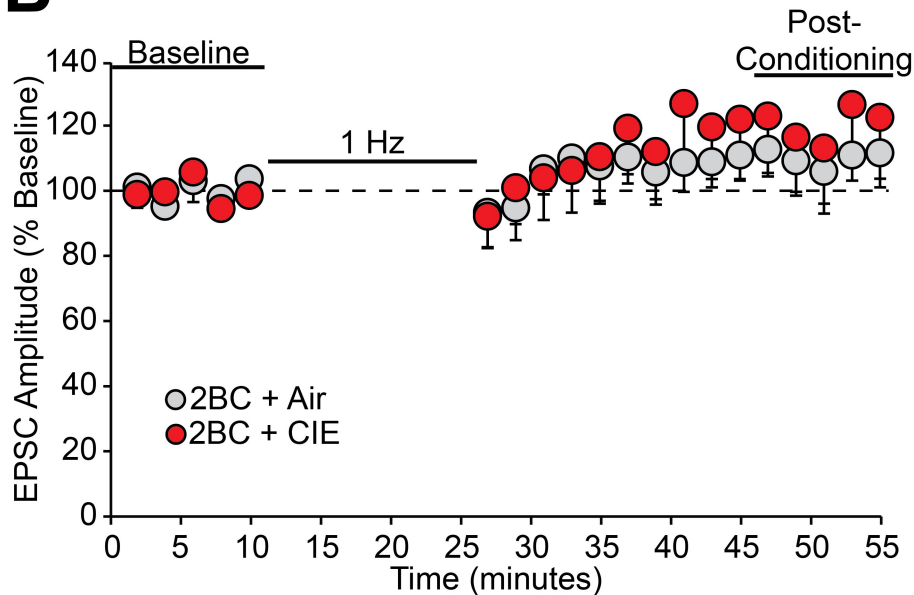**C**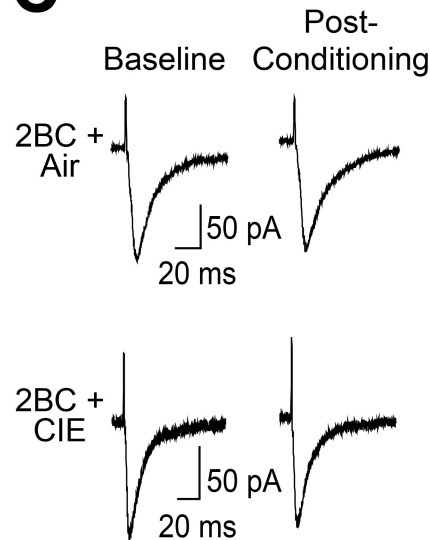

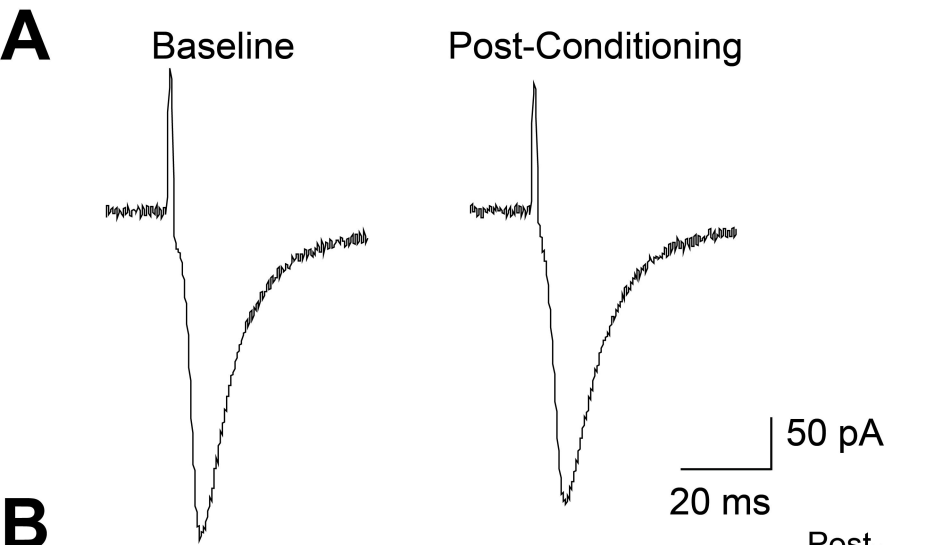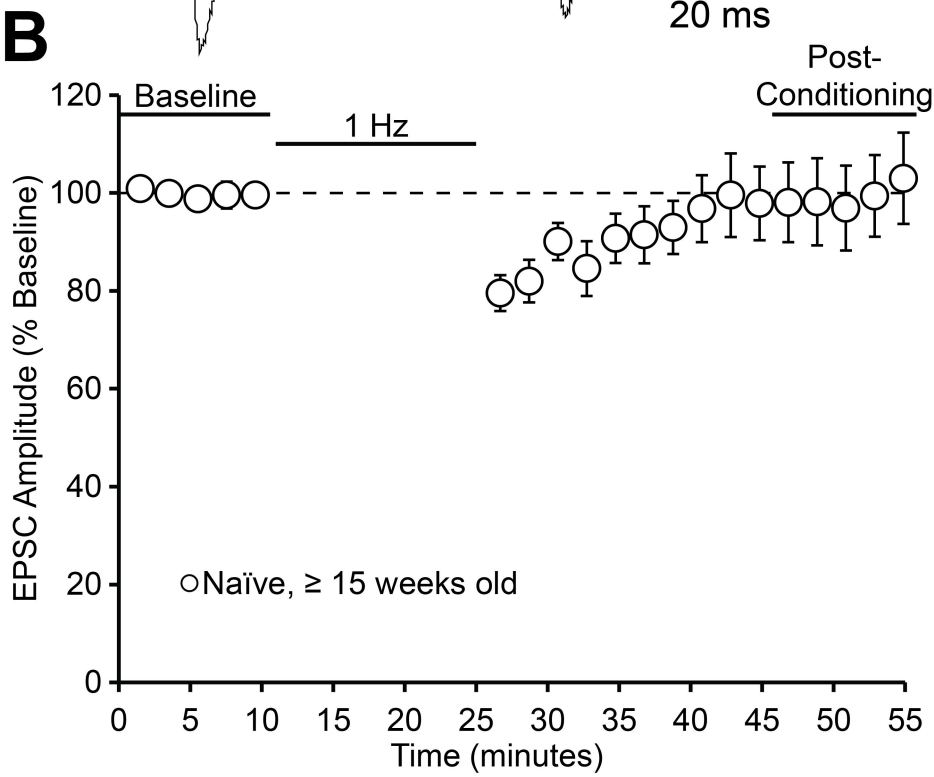

**A**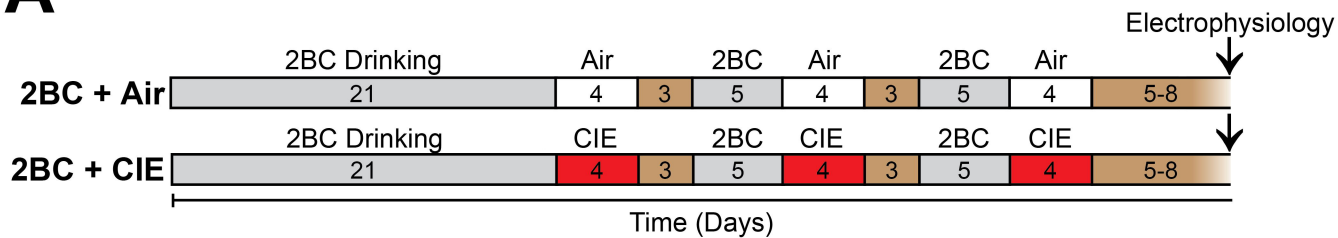**B**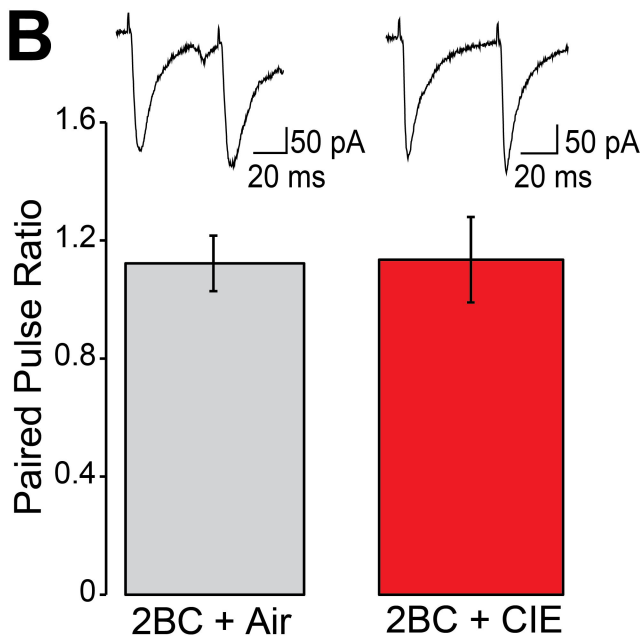**C**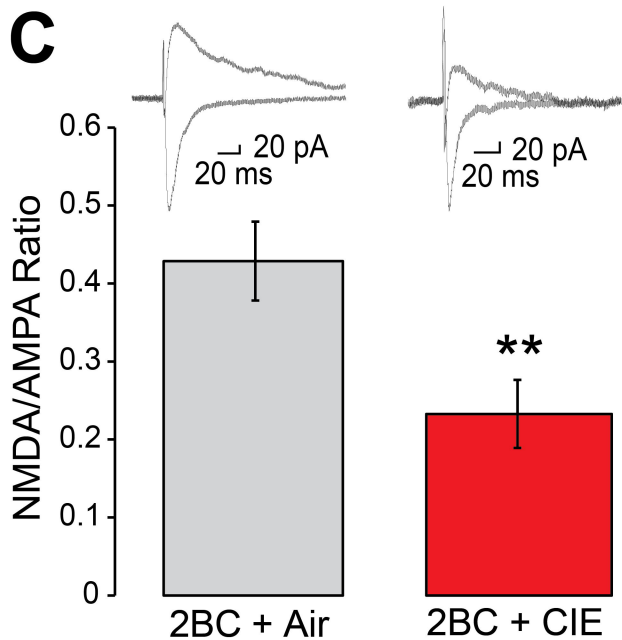**D**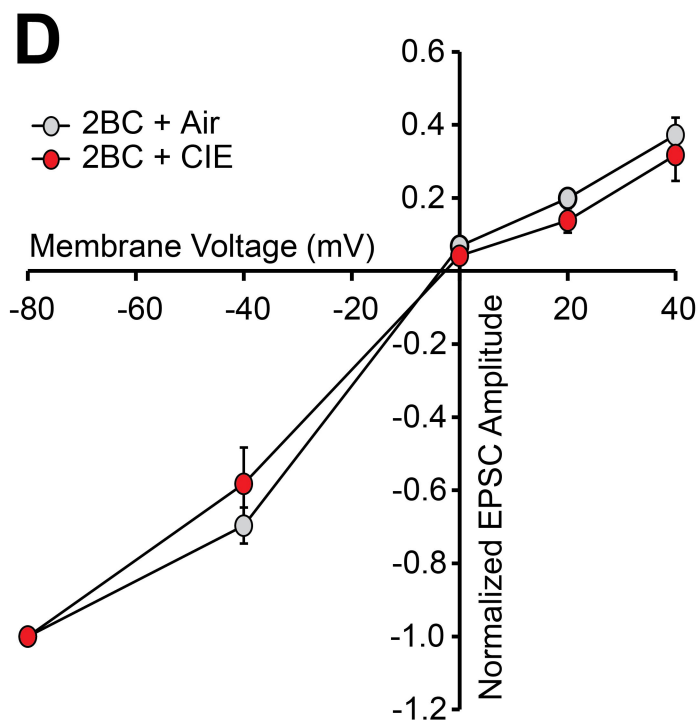**E**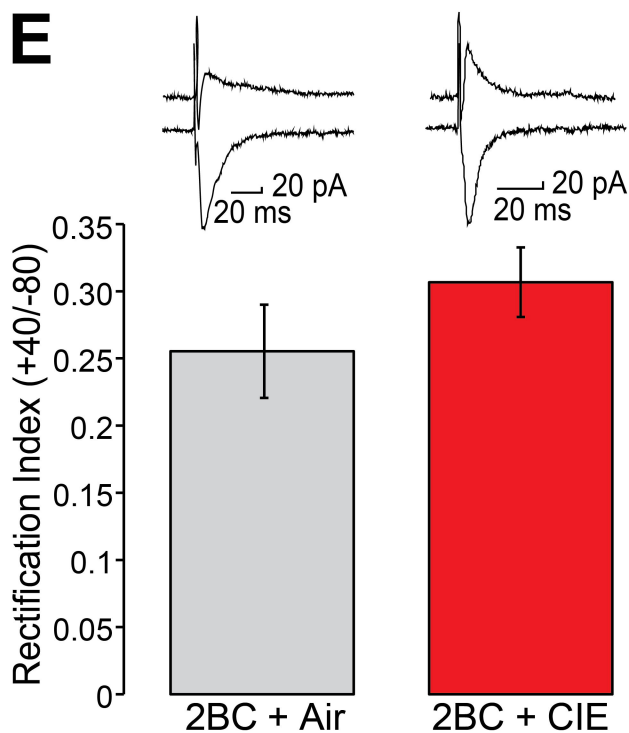

**A**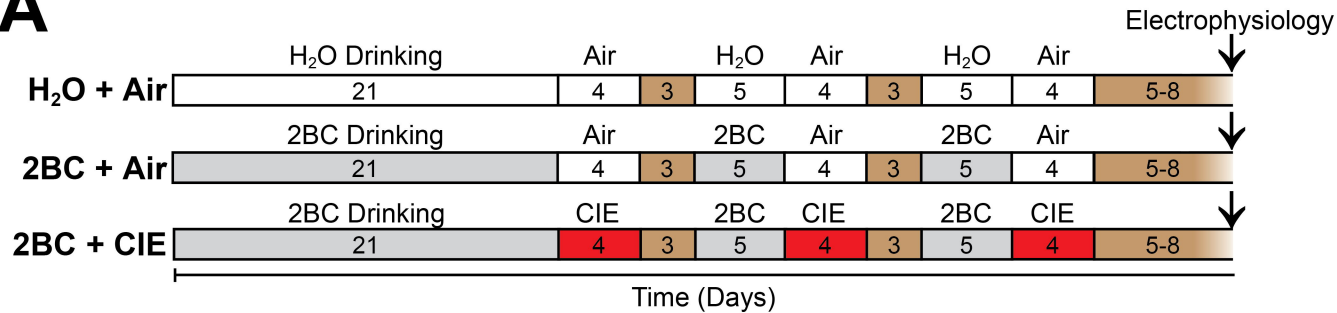**B**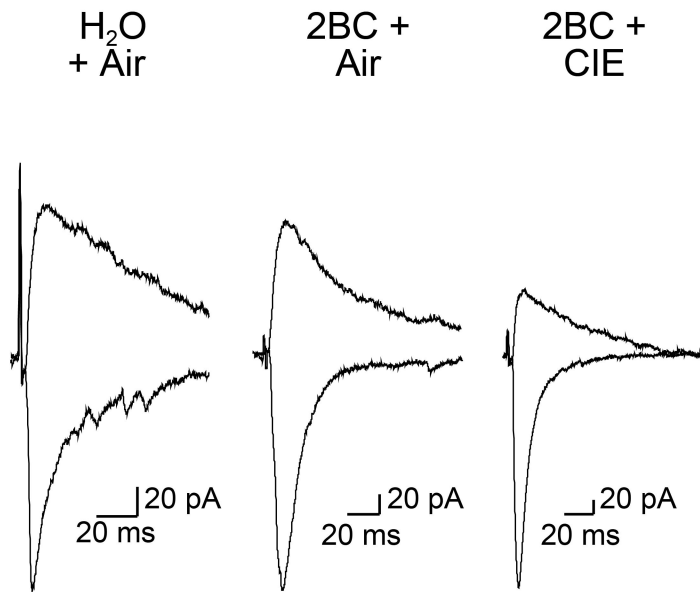**C**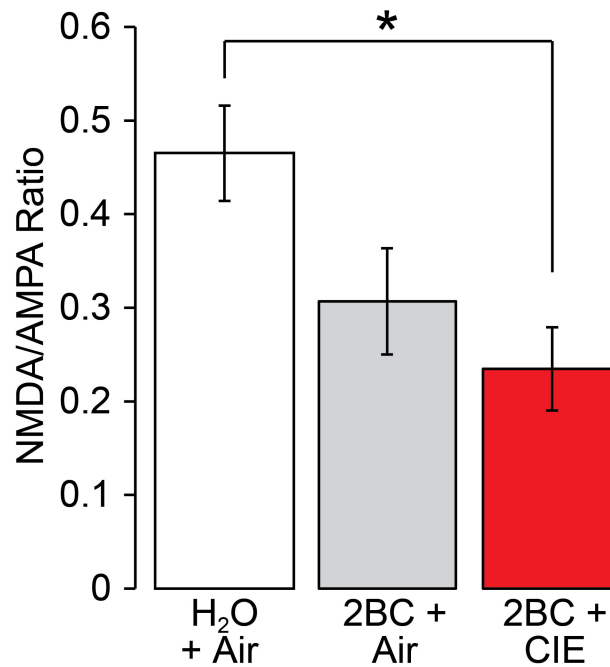

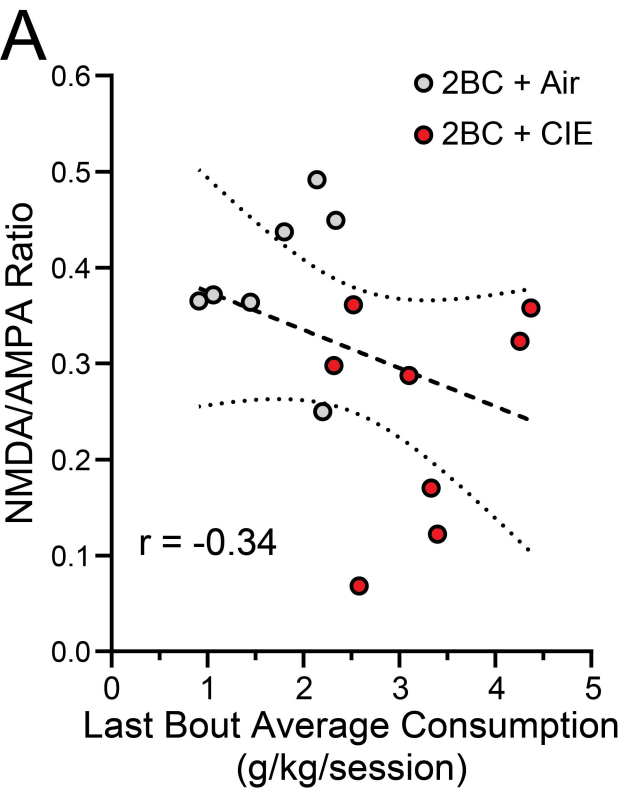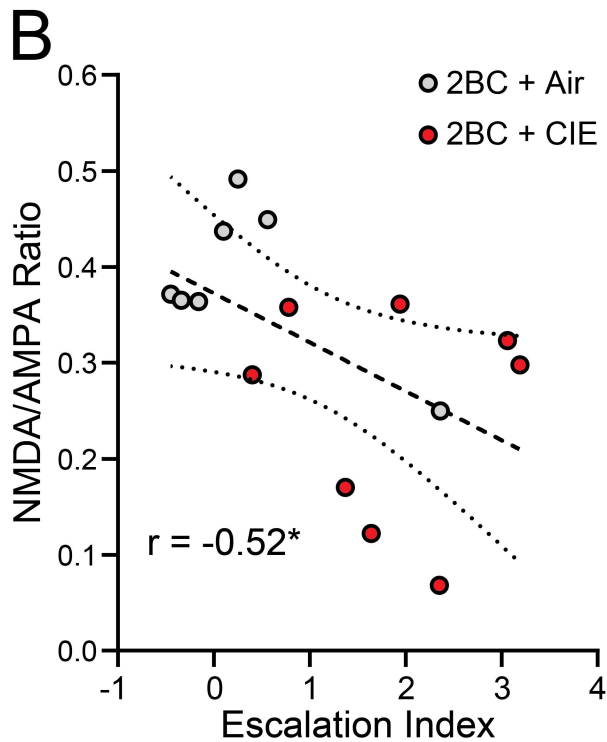

## Alcohol exposure

none

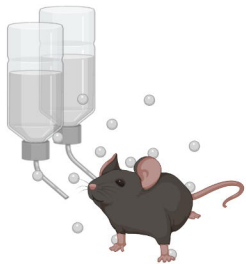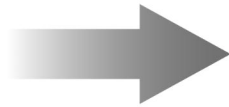

## Agranular insula synaptic strength

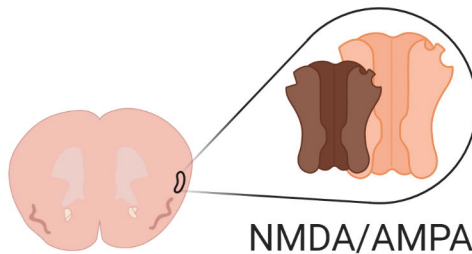

NMDA/AMPA

## Voluntary alcohol consumption

voluntary

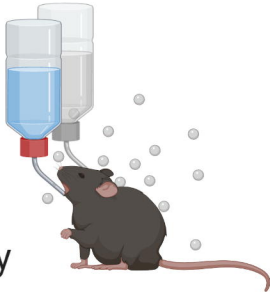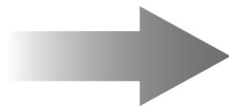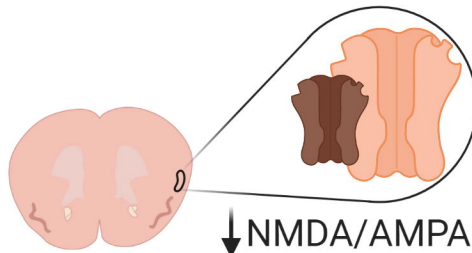

↓ NMDA/AMPA

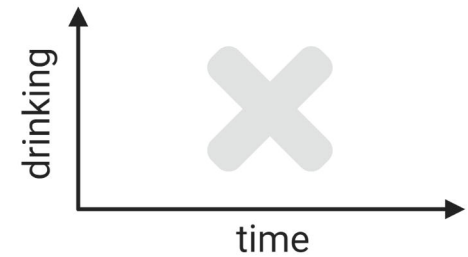

voluntary +  
passive

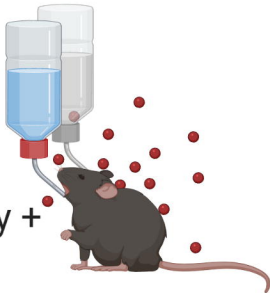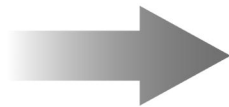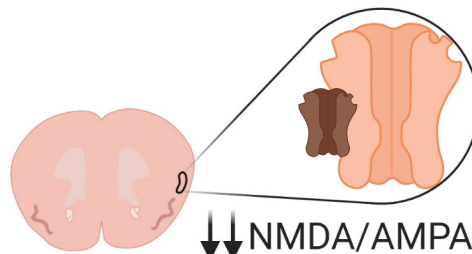

↓↓ NMDA/AMPA

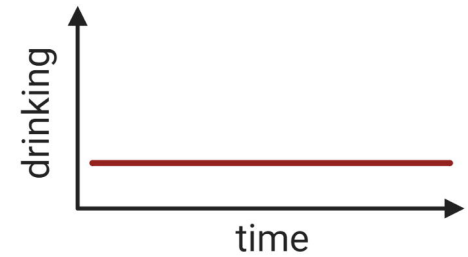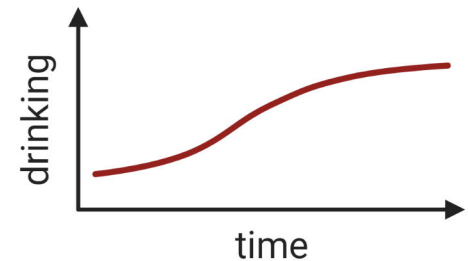

Source: http://biorxiv.org/content/10.1101/2021.05.17.444509v1.full.pdf
